Anesthesiology  
1996; 84:1156-65  
© 1996 American Society of Anesthesiologists, Inc.  
Lippincott-Raven Publishers

## Halothane and Isoflurane Inhibit Vasodilation Due to Constitutive but Not Inducible Nitric Oxide Synthase

### Implications for the Site of Anesthetic Inhibition of the Nitric Oxide/Guanylyl Cyclase Signaling Pathway

Zhiyi Zuo, M.D., Ph.D.,\* Alexandra Tichotsky, M.S.,† Roger A. Johns, M.D.‡

**Background:** Inhalational anesthetics inhibit the nitric oxide-guanylyl cyclase signaling pathway, but the site of this inhibition is not yet clear. This study was designed to test the hypothesis that receptor activation or downstream signaling events leading to nitric oxide synthase activation are important sites for this inhibition by comparing the effect of anesthetics on vasodilation caused by the calcium-dependent constitutive endothelial nitric oxide synthase *versus* the calcium-independent inducible nitric oxide synthase.

**Methods:** Endothelium-intact or -denuded rat thoracic aorta rings preincubated with or without lipopolysaccharide were mounted for isometric tension measurement, constricted with phenylephrine, then relaxed with methacholine in the presence or absence of halothane (1-3%) or isoflurane (1-3%). The cyclic guanosine 3,5-monophosphate content in the endothelium-denuded rings preincubated with or without lipopolysaccharide in the presence or absence of 3% halothane or 3% isoflurane was quantified by radioimmunoassay. The activity of partially purified inducible nitric oxide synthase from activated mouse macrophage was assayed in the presence or absence of halothane (1-4%) or isoflurane (1-5%) by the conversion of <sup>3</sup>H-L-arginine to <sup>3</sup>H-L-citrulline.

**Results:** Halothane and isoflurane inhibited methacholine-stimulated, nitric oxide-mediated vasorelaxation in endothelium-intact aortic rings. Neither halothane nor isoflurane affected the vasorelaxation caused by basal endothelial nitric oxide synthase or inducible nitric oxide synthase activity. Neither anesthetic altered the cyclic guanosine 3,5-mono-

phosphate increase caused by inducible nitric oxide synthase in the lipopolysaccharide-treated rings.

**Conclusions:** The results demonstrate that halothane and isoflurane inhibit only receptor/calcium-activated nitric oxide synthase action and that direct inhibition of nitric oxide synthase, soluble guanylyl cyclase, or an interaction with nitric oxide are not responsible for anesthetic inhibition of endothelium-dependent vasorelaxation. (Key words: Anesthetics, volatile: halothane; isoflurane. Artery, endothelium: endothelium-derived relaxing factor; nitric oxide. Enzymes, nitric oxide synthase: endothelial; inducible. Nucleotides: cyclic guanosine 3,5-monophosphate. Vascular smooth muscle: vasodilation.)

ENDOTHELIUM-DERIVED relaxing factor, first discovered as a potent vasodilator produced by endothelium<sup>1</sup> is now known as nitric oxide or a chemically related compound.<sup>2</sup> Extensive studies have demonstrated that nitric oxide is an agonist for soluble guanylyl cyclase and that this nitric oxide-guanylyl cyclase signaling pathway is present in a variety of tissues.<sup>3,4</sup> The enzymes responsible for the synthesis of nitric oxide from L-arginine in mammalian tissue are known as nitric oxide synthase.<sup>4</sup> There are three major isoforms of nitric oxide synthase.<sup>5</sup> Two are constitutive enzymes, one normally expressed in the endothelium and one in neurons. A third inducible isoform can be produced in a variety of cells including smooth muscle cells<sup>6</sup> and macrophages<sup>7</sup> only after induction by endotoxin or cytokines such as tumor necrosis factor- $\alpha$  and interferon- $\gamma$ . Both constitutive and inducible isoforms contain a heme moiety and require  $\beta$ -nicotinamide adenine dinucleotide phosphate (reduced form, NADPH), flavin adenine dinucleotide, flavin mononucleotide, and tetrahydrobiopterin as cofactors.<sup>5,8</sup> The constitutive isoforms also are calcium and calmodulin dependent, whereas the inducible isoform has a tightly bound cal-

\* Research Associate.

† Senior Technician.

‡ Professor.

Received from the Department of Anesthesiology, University of Virginia Health Sciences Center, Charlottesville, Virginia. Submitted for publication July 20, 1995. Accepted for publication January 3, 1996. Supported by National Institutes of Health grants RO1 GM 49111 and RO1 HL 39706.

Address reprint requests to Dr. Johns: Box 238, University of Virginia Health Sciences Center, Charlottesville, Virginia 22908. Address electronic mail to: raj2d@virginia.edu.

modulin subunit and activation (fig. 1).<sup>5,9</sup>

Nitric oxide is an atory synaptic trans glutamate, and kaina that some anestheti mission to achieve formation or action demonstrated that (NAME), a specific n dependently and re veolar concentration suggesting an impor oxide-guanylyl cyc thesia or level of c tional anesthetics s rane, and sevoluta hhibit endothelum-rings.<sup>14-16</sup> However effects are contro the site of inhibiti cyclase activation. however, indicate t inhibit the formati work as a scavenger formation or may e soluble guanylyl cy studies, using par clearly demonstrat ther affect the bas particulate guanyly the endothelial or in vitro.<sup>24,25</sup> Our s muscle coculture bility of the activa ide as the inhibitor In light of these the receptor activa leading to nitric o inhibition for inha ide-guanylyl cycla signaling pathway or inducible nitric of inhibition of inc vasorelaxation by thetics do not affe zymatic function, activation, or effe phosphate (cGMP We therefore test

## ANESTHETICS AND NITRIC OXIDE-GUANYLYL CYCLASE PATHWAY

modulin subunit and does not require calcium for activation (fig. 1).<sup>5,9</sup>

Nitric oxide is an important mediator for the excitatory synaptic transmission of N-methyl-D-aspartate, glutamate, and kainate in the brain.<sup>10-12</sup> It is proposed that some anesthetics may suppress excitatory transmission to achieve anesthesia through inhibiting the formation or action of nitric oxide. Johns *et al.*<sup>13</sup> have demonstrated that nitro<sup>G</sup>-L-arginine methyl ester (L-NAME), a specific nitric oxide synthase inhibitor, dose dependently and reversibly reduces the minimum alveolar concentration of halothane anesthesia in rats, suggesting an important relationship between the nitric oxide-guanylyl cyclase signaling pathway and anesthesia or level of consciousness. In addition, inhalational anesthetics such as halothane, enflurane, isoflurane, and sevoflurane have been demonstrated to inhibit endothelium-dependent vasodilation in arterial rings.<sup>14-16</sup> However, the mechanisms underlying these effects are controversial.<sup>17</sup> Early studies suggest that the site of inhibition is proximal to soluble guanylyl cyclase activation.<sup>14,15,18,19</sup> Some more recent reports, however, indicate that inhalational anesthetics may also inhibit the formation or release of nitric oxide or may work as a scavenger to inactivate nitric oxide after its formation or may even interfere with the activation of soluble guanylyl cyclase by nitric oxide.<sup>20-23</sup> Our recent studies, using partially purified enzymes, however, clearly demonstrate that inhalational anesthetics neither affect the basal or agonist-stimulated soluble or particulate guanylyl cyclase activity nor directly inhibit the endothelial or brain nitric oxide synthase activity *in vitro*.<sup>24,25</sup> Our study, using an endothelium-smooth muscle coculture model, further excluded the possibility of the activation of guanylyl cyclase by nitric oxide as the inhibitory site for inhalational anesthetics.<sup>26</sup>

In light of these observations, we hypothesized that the receptor activation or downstream signaling events leading to nitric oxide synthase activation are sites of inhibition for inhalational anesthetics on the nitric oxide-guanylyl cyclase signaling pathway. Because the signaling pathway after the activation of constitutive or inducible nitric oxide synthase is identical, the lack of inhibition of inducible nitric oxide synthase-induced vasorelaxation by anesthetics would imply that anesthetics do not affect activated nitric oxide synthase enzymatic function, nitric oxide itself, guanylyl cyclase activation, or effects of cyclic guanosine 3,5-monophosphate (cGMP) in causing vasorelaxation (fig. 1). We therefore tested our hypothesis by comparing the

effects of inhalational anesthetics on calcium-/calmodulin-dependent and calcium-/calmodulin-independent nitric oxide synthase activation in rat aortic rings preincubated with or without lipopolysaccharide (LPS), measuring the agonist-stimulated constriction and relaxation as well as cGMP changes. The effect of inhalational anesthetics on partially purified inducible nitric oxide synthase activity also was investigated to confirm the results of our aortic ring study.

## Materials and Methods

### Preparation of Vascular Rings

Male Sprague-Dawley rats (weighing 300–350 g) were killed in accordance with our institutional Research and Animal Welfare Committee standards. The descending thoracic aorta was gently removed and placed in ice-cold modified Krebs' buffer (all in mM: NaCl 111, KCl 5, NaH<sub>2</sub>PO<sub>4</sub> 1, MgCl<sub>2</sub> 0.5, NaHCO<sub>3</sub> 25, CaCl<sub>2</sub> 2.5, dextrose 11.1). The aorta was then dissected clean of fat and surrounding connective tissue and cut into 2.5–3.0-mm ring segments. The rings were then incubated in Dulbecco's Modified Eagle's Medium (Gibco, Grand Island, NY) containing 4,500 mg/l D-glucose and L-glutamine either with or without 500 ng/ml LPS for 5 h at 37°C and continuously gassed with air and 5% CO<sub>2</sub>.<sup>27</sup>

### Isometric Tension Measurements

The rings were either left with their endothelia intact or denuded of endothelium by gentle rotation on a forceps. The rings were then mounted on Grass Ft-03 force transducers (Grass, Quincy, MA) at 2.0 g resting tension in 37°C water-jacketed 25-ml tissue baths containing 10 ml modified Krebs' buffer continuously gassed with air and 5% CO<sub>2</sub>. Indomethacin (28 μM), an inhibitor of cyclooxygenase metabolism of arachidonic acid,<sup>14</sup> was added to the buffer throughout all experiments to prevent formation of vasoactive prostanoid metabolites. The buffer was changed every 15 min during a 60-min equilibration period. Endothelial-intact status was confirmed by constricting rings with 10<sup>-7</sup> M phenylephrine followed by relaxing them with 10<sup>-6</sup> M methacholine. If they relaxed more than 40% to methacholine they were considered to be endothelium-intact rings. Endothelium-denuded rings showed no relaxation. Rings were then washed and reequilibrated to basal tension.

Eight rings of each experiment were divided into four duplicate groups (one used for the anesthetic study,



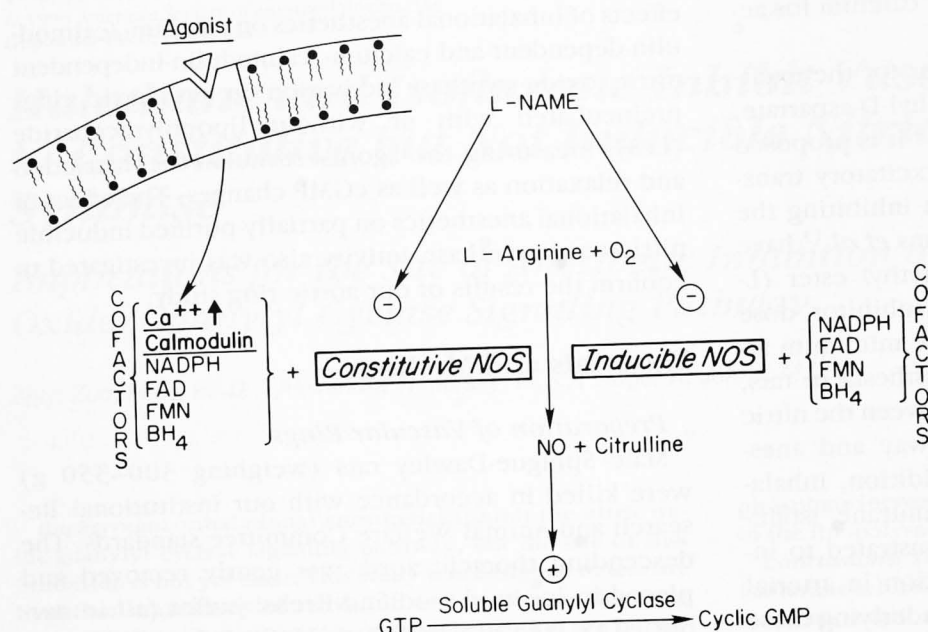

Fig. 1. Diagram of nitric oxide-guanylyl cyclase signaling pathway showing the difference between the constitutive and inducible nitric oxide synthase pathways.

the other one used as a time-control): 1) endothelium-intact, 2) endothelium-denuded, 3) LPS-preincubated and endothelium-intact, and 4) LPS-preincubated and endothelium-denuded rings. The experimental protocols were as follows: Dose-response curves for phenylephrine ( $10^{-8}$  to  $10^{-5}$  M) were first obtained to individualize the EC60 dose for each ring. This EC60 dose (60% maximal contractile dose) was used to achieve active tension and the rings were then subjected to methacholine ( $10^{-7}$ – $10^{-5}$  M). The values obtained were considered as preanesthetic control and the same experimental procedure was repeated in the presence or absence (time-control experiments) of 1%, 2%, or 3% halothane or isoflurane. Halothane or isoflurane was added to the rings 5 min before the addition of phenylephrine by a calibrated vaporizer in line with the air and 5%  $\text{CO}_2$  gas at a flow rate of 4 l/min. Preliminary gas chromatographic studies suggested that the concentration of halothane or isoflurane in the buffer reached plateau after 5 min of gassing under these experimental conditions.<sup>14,24</sup> Postanesthetic controls were then obtained in the absence of anesthetics. The ability of L-NAME, a competitive inhibitor of nitric oxide synthase, to reverse the relaxation caused by LPS induction or by methacholine was investigated by adding 300  $\mu\text{M}$  L-NAME 10 min before the addition of the same EC60 dose of phenylephrine to each of the rings. These reversal experiments were done to measure the portion of relaxation due to the nitric oxide-gua-

nylyl cyclase signaling pathway in the total relaxation caused by LPS or methacholine.

#### Cyclic Guanosine 3,5-Monophosphate Analysis of Rings

Denuded rat descending thoracic aortic rings were prepared and incubated with  $3 \times 10^{-7}$  M phenylephrine for 6 min at  $37^\circ\text{C}$  in the presence or absence of 3% halothane or 3% isoflurane preincubated as described earlier. The rings were then flash-frozen in dry ice-cooled acetone. Cyclic GMP was extracted by homogenizing each ring in 1 ml of 0.1 N ice-cold hydrochloride. After centrifugation at 1000g for 10 min, the supernatant was analyzed for cGMP content by radioimmunoassay ( $^{125}\text{I}$  kit, Amersham, Buckinghamshire, UK).<sup>28</sup> Protein content was determined by dissolving the homogenate in 0.66 N NaOH and analyzing the total dissolved protein with the Bio-Rad protein assay method (Richmond, CA).<sup>29</sup>

#### Partially Purified Inducible Nitric Oxide Synthase Assay

Mouse RAW 264.7 macrophages were cultured in RPMI 1640 (Gibco) containing 10% fetal bovine serum. The confluent macrophages were then activated to express inducible nitric oxide synthase by incubating with LPS (300 ng/ml) in the same medium for 24 h at  $37^\circ\text{C}$ . Partially purified inducible nitric oxide synthase was prepared in a manner similar to that previously described.<sup>7</sup>

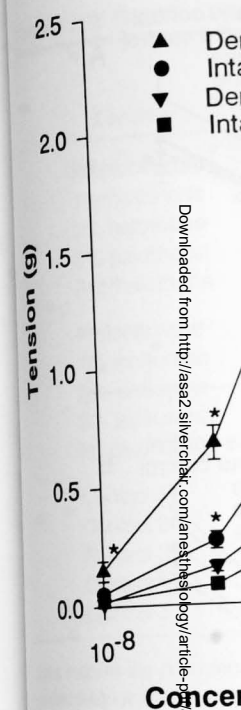

Fig. 2. Phenylephrine dose-response curves in aortic artery rings prepared with or without endothelium. Each data point represents the mean  $\pm$  SEM of 8–10 rings. \* $P < 0.05$  compared to the control.

Briefly, LPS stimulated rings were washed twice with Tyrode solution (pH 7.4, Gibco). The rings were then cut into 1 mm segments and placed in a tissue grinder fitted with a 1 mm pestle. The rings were homogenized in 50 mM Tris-HCl buffer, pH 7.4, containing 1 mM EDTA, 1 mM EGTA, 1 mM dithiothreitol, 1 mM PMSF, and 1 mM NaCl. Homogenates were centrifuged at  $4^\circ\text{C}$ . The supernatant was the source of inducible NOS. The cGMP content in the supernatant was measured by the Bio-Rad protein assay method. Nitric oxide synthase activity was measured by measuring the formation of  $[\text{G}]\text{cGMP}$  from L-arginine as described previously.<sup>7</sup> The reaction mixture contained 50 mM Tris-HCl, pH 7.4, 1 mM EDTA, 1 mM EGTA, 1 mM dithiothreitol, 1 mM PMSF, 1 mM NaCl, 50  $\mu\text{M}$   $^3\text{H}$ -L-arginine, and 1 mM halothane (1–4%) or isoflurane. Preliminary time-course experiments showed that the increasing activity of

## ANESTHETICS AND NITRIC OXIDE-GUANYLYL CYCLASE PATHWAY

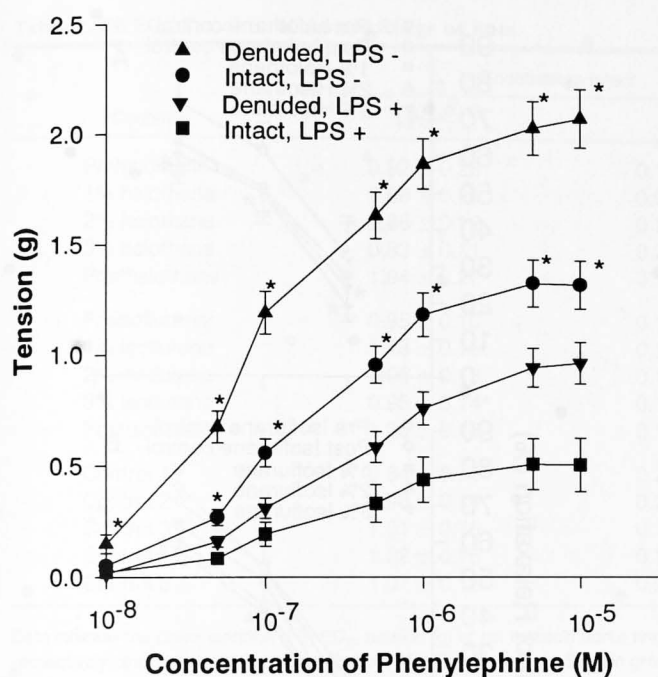

Fig. 2. Phenylephrine dose-response curve for rat thoracic aortic artery rings preincubated in the presence or absence of lipopolysaccharide (LPS+ and LPS-, respectively) and with or without endothelium (intact and denuded, respectively). Each data point represents mean  $\pm$  SEM with  $n = 24$ –28 animals. \* $P < 0.05$  compared to the lipopolysaccharide-treated counterpart.

Briefly, LPS stimulated macrophages were collected and washed twice with Dulbecco's phosphate-buffered saline (pH 7.4, Gibco). The cells were then homogenized by a tissue grinder fitted with a polytetrafluorethylene pestle in 50 mM Tris-HCl (pH 7.4) containing 0.1 mM ethylenediaminetetraacetic acid, 0.1 mM EGTA, 0.5 mM dithiothreitol, 1  $\mu$ M pepstatin, and 2  $\mu$ M leupeptin at 4°C. Homogenates were centrifuged at 100,000g for 60 min at 4°C. The supernatant was collected and used as the source of inducible nitric oxide synthase. The protein content in the supernatant also was measured with the Bio-Rad protein assay method.<sup>29</sup>

Nitric oxide synthase activity was determined by measuring the formation of <sup>3</sup>H-L-citrulline from <sup>3</sup>H-L-arginine as described.<sup>7</sup> Enzymatic reactions were performed in the reaction mixture (final volume 250  $\mu$ l) containing 50 mM Tris-HCl (pH 7.4), 0.1 mM L-citrulline, 0.1 mM NADPH, 10  $\mu$ M tetrahydrobiopterin, and 50  $\mu$ M <sup>3</sup>H-L-arginine in the presence or absence of halothane (1–4%) or isoflurane (1–5%) for 10 min at 37°C. Preliminary time-course data demonstrated a linear increasing activity of the inducible nitric oxide synthase

over the initial 10-min period of incubation under the current experimental conditions. Enzymatic reactions were terminated by adding 2 ml ice-cold stop buffer containing 20 mM sodium acetate (pH 5.5), 1 mM L-citrulline, 2 mM ethylenediaminetetraacetic acid, and 0.2 mM EGTA. The <sup>3</sup>H-L-citrulline produced was then separated from <sup>3</sup>H-L-arginine by Dowex AG 50W-X8 (Na+ form, Bio-Rad Laboratories, Hercules, CA) column.<sup>7,25</sup>

#### Data Analysis

Data are presented as mean  $\pm$  SEM. The percent relaxation in the isometric tension study was calculated by dividing methacholine-induced relaxation (in grams) from the stable phenylephrine plateau constriction by the phenylephrine plateau constriction (in grams) and multiplying by 100. Statistical comparisons were made using paired Student's *t* test when comparing isometric tension of the same aortic rings treated with or without inhalational anesthetics or using one-way analysis of variance followed by Neuman-Keuls means comparison testing between different groups of aortic rings in the isometric tension study, cGMP study or partially purified inducible nitric oxide synthase activity study.  $P < 0.05$  was considered significant. Each data point represents the mean of the data from at least six animals.

#### Drugs and Chemicals

Phenylephrine, methacholine, indomethacin, L-NAME, and L-citrulline were obtained from Sigma (St. Louis, MO). Halothane was obtained from Halocarbon Laboratories (Hackensack, NJ), isoflurane from Ohmeda Caribe Inc (Liberty Corner, NJ). Dowex AG 50W-X8 (Na+ form) and Bio-Rad protein assay reagent were obtained from Bio-Rad. Gasses (95% air and 5% CO<sub>2</sub>) were obtained from Roberts Oxygen Company (Waynesboro, VA).

#### Results

##### Isometric Tension Study

Lipopolysaccharide significantly decreased the peak tension and shifted the dose-response curve of phenylephrine to the right in both endothelium-intact and -denuded aortic rings (fig. 2). The phenylephrine EC<sub>60</sub> was  $2.20 \times 10^{-7}$  M and  $1.54 \times 10^{-7}$  M, respectively, for endothelium-intact and -denuded rings without LPS treatment, which were significantly different from those of



their counterparts with LPS treatment ( $3.88 \times 10^{-7}$  M and  $4.14 \times 10^{-7}$  M, respectively,  $n = 24-28$ ,  $P < 0.05$ ).

Halothane and isoflurane significantly inhibited (at 2% or 3% of halothane or isoflurane) endothelium-dependent relaxation caused by methacholine in the rings without LPS treatment (figs. 3A and 3B). This inhibition was reversible because methacholine caused the same extent of relaxation in the postanesthetic control as that in the preanesthetic control (figs. 3A and 3B). This inhibition is not owing to the different experimental cycles because the parallel time-control experiments showed virtually identical magnitude of relaxation caused by methacholine over the five experimental cycles (fig. 3C).

Neither halothane nor isoflurane at concentrations of 1–3% affected the basal tension of rings in any groups studied. The LPS-exposed aortic rings developed less than 40% of the phenylephrine EC<sub>60</sub> tension of the nonexposed counterparts (table 1). Halothane reversibly inhibited the phenylephrine EC<sub>60</sub> tension in endothelium-denuded rings without LPS treatment. Thus, the phenylephrine EC<sub>60</sub> tension of endothelium-denuded rings in the presence of 3% halothane was significantly lower than that of posthalothane control ( $P < 0.05$ ). Similarly, 3% isoflurane also significantly inhibited the phenylephrine EC<sub>60</sub> tension compared to that of the postisoflurane control in both endothelium-intact and -denuded rings without LPS treatment ( $P < 0.05$ ). Isoflurane (3%) also significantly inhibited the phenylephrine EC<sub>60</sub> tension compared to that of postisoflurane control in endothelium-denuded rings with LPS treatment ( $P < 0.05$ ). However, the phenylephrine EC<sub>60</sub> tension in the endothelium-intact rings incubated with LPS was neither affected by halothane nor isoflurane. Halothane also failed to affect the phenylephrine EC<sub>60</sub> tension in the endothelium-intact, LPS-treated rings (table 1). The parallel time control experiments excluded the possibility that the phenylephrine EC<sub>60</sub> tension changes described earlier were caused by different experimental cycles (Table 1).

L-NAME (300  $\mu$ M) significantly increased the phenylephrine EC<sub>60</sub> tension of both endothelium-intact and -denuded rings treated with LPS ( $P < 0.05$ ; fig. 4). However, the phenylephrine EC<sub>60</sub> tension of these rings in the presence of 300  $\mu$ M L-NAME was still significantly lower than that of the rings without LPS treatment in the presence of 300  $\mu$ M L-NAME (fig. 4), suggesting that 300  $\mu$ M L-NAME only partially reversed the effects of LPS on the phenylephrine EC<sub>60</sub> tension of these rings, which is consistent with previous work

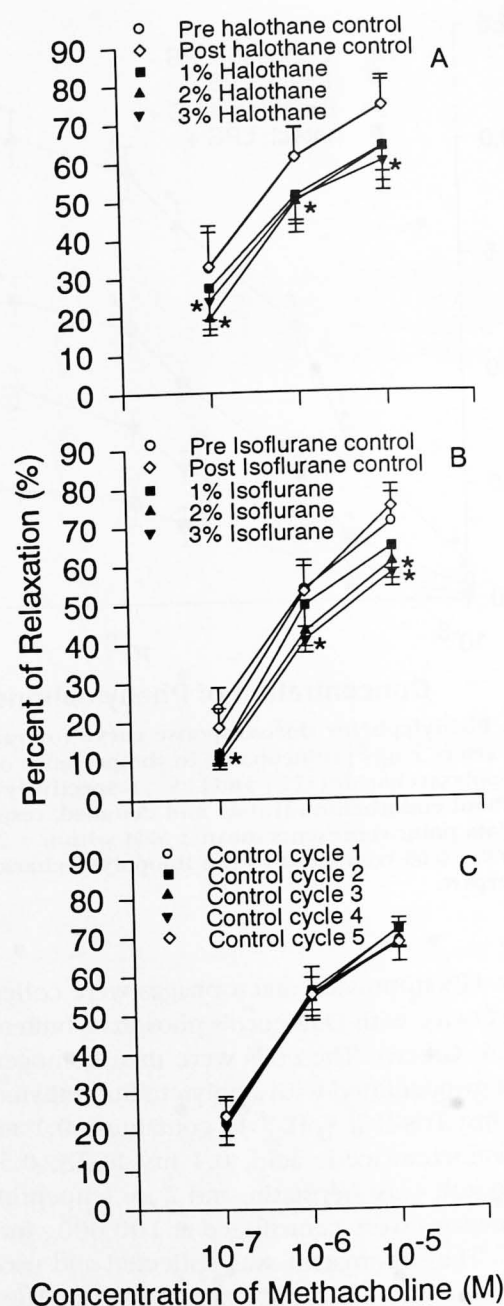

Fig. 3. Effect of halothane (A) or isoflurane (B) on methacholine-induced, endothelium-dependent vasodilation of rat thoracic aortic rings precontracted with phenylephrine (EC<sub>60</sub> dose). The time-control experiment (C). Each data point represents mean  $\pm$  SEM with  $n = 6-8$  animals. \* $P < 0.05$  compared to the preanesthetic and postanesthetic controls.

from our laboratory.<sup>27</sup> However, 300  $\mu$ M L-NAME abolished the response to methacholine of endothelium-intact rings without LPS treatment (1  $\mu$ M methacholine relaxed these rings precontracted with phenylephrine EC<sub>60</sub> only by  $1.25 \pm 0.66\%$  in the presence of 300  $\mu$ M

Table 1. PE EC<sub>60</sub> Tension

| Condition      |
|----------------|
| Prehalothane   |
| 1% halothane   |
| 2% halothane   |
| 3% halothane   |
| Posthalothane  |
| Preisoflurane  |
| 1% isoflurane  |
| 2% isoflurane  |
| 3% isoflurane  |
| Postisoflurane |
| Control 1      |
| Control 2      |
| Control 3      |
| Control 4      |
| Control 5      |

Data indicate the phenylephrine EC<sub>60</sub> tension (mmHg) and with or without LPS treatment. EC<sub>60</sub> = 60% maximal contraction. \* $P < 0.05$  versus the postanesthetic control.

L-NAME,  $n = 12$ , to 0).

#### Cyclic Guanosine

Cyclic guanosine monophosphate (cGMP) is an endothelium-dependent vasodilator. Its release is inhibited by exposure to L-NAME, halothane, or 3% isoflurane, and cGMP content in

#### Inducible Nitric Oxide

Neither halothane nor isoflurane significantly altered nitric oxide activity (fig. 6).

#### Discussion

Several studies have shown that anesthetics inhibit the nitric oxide pathway.<sup>13-16,30,31</sup> This inhibition takes place at the level of the enzyme that includes the synthesis of nitric oxide as well as the release of nitric oxide. We investigated the effect of rings treated with

## ANESTHETICS AND NITRIC OXIDE-GUANYLYL CYCLASE PATHWAY

Table 1. PE EC<sub>60</sub> Tension of Aortic Rings of Rats

| Condition      | Endothelium Intact |             | Endothelium Denuded |              |
|----------------|--------------------|-------------|---------------------|--------------|
|                | LPS (-)            | LPS (+)     | LPS (-)             | LPS (+)      |
| Prehalothane   | 0.92 ± 0.25        | 0.12 ± 0.03 | 1.56 ± 0.32         | 0.54 ± 0.09  |
| 1% halothane   | 0.89 ± 0.12        | 0.09 ± 0.02 | 1.56 ± 0.21         | 0.59 ± 0.16  |
| 2% halothane   | 0.86 ± 0.12        | 0.28 ± 0.16 | 1.54 ± 0.26         | 0.87 ± 0.20  |
| 3% halothane   | 0.83 ± 0.11        | 0.28 ± 0.16 | 1.42 ± 0.30*        | 0.86 ± 0.15  |
| Posthalothane  | 1.04 ± 0.22        | 0.15 ± 0.04 | 2.04 ± 0.25         | 0.93 ± 0.12  |
| Preisoflurane  | 0.95 ± 0.10        | 0.15 ± 0.06 | 1.61 ± 0.09         | 0.44 ± 0.13  |
| 1% isoflurane  | 1.13 ± 0.15        | 0.14 ± 0.07 | 1.74 ± 0.21         | 0.47 ± 0.12  |
| 2% isoflurane  | 1.06 ± 0.13        | 0.14 ± 0.07 | 1.74 ± 0.22         | 0.46 ± 0.13  |
| 3% isoflurane  | 0.95 ± 0.14*       | 0.16 ± 0.10 | 1.56 ± 0.20*        | 0.36 ± 0.09* |
| Postisoflurane | 1.20 ± 0.18        | 0.13 ± 0.06 | 2.00 ± 0.26         | 0.48 ± 0.12  |
| Control 1      | 0.84 ± 0.13        | 0.24 ± 0.08 | 1.57 ± 0.15         | 0.58 ± 0.10  |
| Control 2      | 0.96 ± 0.14        | 0.21 ± 0.07 | 1.74 ± 0.17         | 0.59 ± 0.13  |
| Control 3      | 1.01 ± 0.16        | 0.19 ± 0.06 | 1.70 ± 0.16         | 0.73 ± 0.18  |
| Control 4      | 1.02 ± 0.16        | 0.22 ± 0.07 | 1.89 ± 0.15         | 0.90 ± 0.20  |
| Control 5      | 1.07 ± 0.15        | 0.25 ± 0.10 | 1.90 ± 0.18         | 0.91 ± 0.20  |

Data indicate the phenylephrine (PE) EC<sub>60</sub> tension (g) of rat thoracic aortic rings preincubated in the presence or absence of lipopolysaccharide (LPS+ and LPS-, respectively) and with or without endothelium. Values are mean ± SEM in grams with n = 6-8 animals.

EC<sub>60</sub> = 60% maximal contractile dose of phenylephrine.

\* *P* < 0.05 versus the postanesthetic control.

L-NAME, n = 12, *P* > 0.05 comparing 1.25 ± 0.66% to 0).

#### Cyclic Guanosine 3,5-Monophosphate

Cyclic guanosine 3,5-monophosphate content in the endothelium-denuded rings was significantly increased by exposure to LPS (*P* < 0.05). However, neither 3% halothane nor 3% isoflurane significantly decreased the cGMP content in the LPS-treated rings (fig. 5).

#### Inducible Nitric Oxide Synthase Activity

Neither halothane (1-4%) nor isoflurane (1-5%) significantly altered the inducible nitric oxide synthase activity (fig. 6).

#### Discussion

Several studies indicate that inhalational anesthetics inhibit the nitric oxide-guanylyl cyclase signaling pathway.<sup>13-16,30,31</sup> However, the site(s) at which this inhibition takes place are not clear. The proposed sites include the synthesis, release, or transport of nitric oxide as well as the activation of guanylyl cyclase.<sup>17</sup> We investigated the possible inhibitory sites using rat aortic rings treated with or without LPS.

Lipopolysaccharide has been demonstrated to induce expression of the inducible nitric oxide synthase isoform in endothelium and vascular smooth muscle cells as well as macrophages.<sup>7,32,33</sup> In the current study, L-NAME, a specific nitric oxide synthase inhibitor, significantly increased the phenylephrine EC<sub>60</sub> of the LPS-treated aortic rings, suggesting the induction of inducible nitric oxide synthase. Because inducible nitric oxide synthase has calmodulin tightly bound in its resting state, it is continuously activated without additional calcium.<sup>5,9</sup> The observation that neither halothane nor isoflurane significantly increased the phenylephrine EC<sub>60</sub> tension in the LPS-treated rings suggests that neither inhalational anesthetic inhibits the nitric oxide production of these vascular rings. The cGMP data further suggest that halothane and isoflurane do not inhibit the inducible nitric oxide synthase activity because the cGMP increase caused by inducible nitric oxide synthase was not affected by either anesthetic. Consistent with this, neither halothane nor isoflurane significantly inhibited the partially purified inducible nitric oxide synthase activity. Therefore, direct inhibition of nitric oxide synthase enzymatic function or any distal point in the nitric oxide-guanylyl cyclase-cGMP pathway is not the major site at which these two anesthetics inhibit the nitric oxide-guanylyl cyclase signaling pathway.



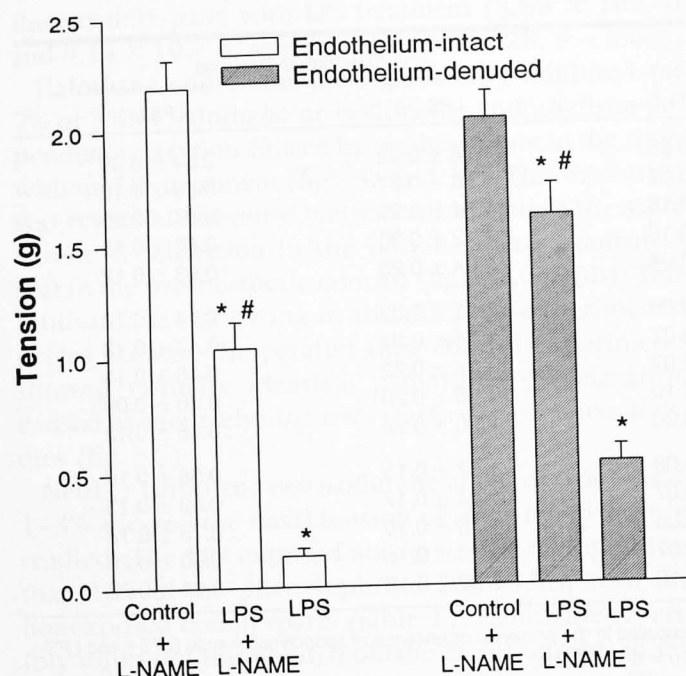

Fig. 4. Effect of 300  $\mu$ M L-NAME on the phenylephrine EC60 tension of LPS-treated rat thoracic aortic rings. Each data point represents mean  $\pm$  SEM with  $n = 12-14$  animals. \* $P < 0.05$  compared to the control plus L-NAME group. # $P < 0.05$  compared to the group of LPS alone.

This is consistent with the results of a study conducted in our laboratory that demonstrated that inhalational anesthetics at concentrations ranging from 1% to 4% produced no significant effect on either endothelial or brain nitric oxide synthase activity *in vitro* under a variety of experimental conditions.<sup>26</sup> However, a study by Tobin *et al.*<sup>20</sup> showed that halothane and isoflurane at clinically relevant concentrations (0.5–2%) inhibited isolated rat brain nitric oxide synthase activity. The reason for these controversial results is not known. However, consistent with our results, Tagliente<sup>34</sup> recently reported that halothane at different concentrations caused no significant change in the Michaelis constant ( $K_m$ ) for L-arginine or maximum velocity ( $V_{max}$ ) of nitric oxide synthase, suggesting that the mechanism of anesthetic action of halothane is not mediated by direct alteration of nitric oxide synthase activity.

Alternatively, guanylyl cyclase has been proposed as the site for inhalational anesthetic inhibition of the nitric oxide-guanylyl cyclase signaling pathway. This has been suggested by arterial ring studies using sodium nitroprusside, nitroglycerin, or nitric oxide as the vessel relaxants<sup>35</sup> and by evaluating the effect of anesthetics

on a partially purified guanylyl cyclase enzyme system.<sup>22,23,36</sup> However, a variety of studies using similar models have not confirmed these observations.<sup>14,24,36</sup> We prepared partially purified soluble and particulate guanylyl cyclases from rat brain and demonstrated that halothane, enflurane, or isoflurane at a very wide range of concentrations did not affect the basal or agonist-stimulated activity of partially purified guanylyl cyclase *in vitro*.<sup>24</sup> Consistent with these results, another study employing endothelium smooth muscle cell coculture methods, using intact cells, also strongly suggested that halothane and isoflurane did not affect the activation of guanylyl cyclase by sodium nitroprusside, nitroglycerin, or nitric oxide.<sup>26</sup> The current study provides further evidence that halothane and isoflurane do not inhibit guanylyl cyclase or the subsequent actions of cGMP in eliciting vascular relaxation. If the activation of guanylyl cyclase or the action of cGMP is the site of inhibition, the increase of cGMP in the LPS-treated rings should be significantly inhibited by halothane or isoflurane and the decrease in constriction to phenylephrine of the LPS-treated rings should be reversed by these two anesthetics. These two effects have not been observed in this study; therefore, current evidence strongly suggests that the inhibitory sites for inhala-

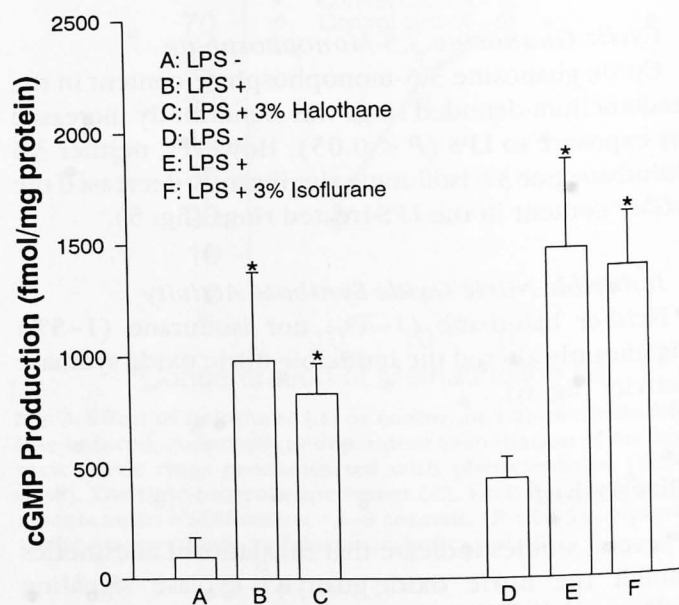

Fig. 5. Effect of halothane and isoflurane on the cyclic guanosine monophosphate content of endothelium-denuded rat thoracic rings. Rings were preincubated in the presence or absence of lipopolysaccharide (LPS+ and LPS-, respectively). Each data point represents mean  $\pm$  SEM with  $n = 6$  animals. \* $P < 0.05$  compared to the rings without lipopolysaccharide treatment.

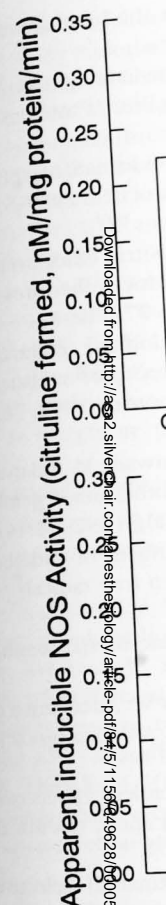

Fig. 6. Effect of halothane and isoflurane on the apparent inducible NOS activity of partially purified mouse macrophages. Each data point represents mean  $\pm$  SEM with  $n = 9$ .

tional anesthetic signaling pathway. Endothelial nitric oxide synthase is a form of nitric oxide synthase for activation<sup>5</sup> (carinic receptors) resulting in a release of calcium from sources and a release of nitric oxide.<sup>14</sup> Nitric oxide of endothelium induce vasorelaxation. The contribution of vasorelaxation to

## ANESTHETICS AND NITRIC OXIDE-GUANYLYL CYCLASE PATHWAY

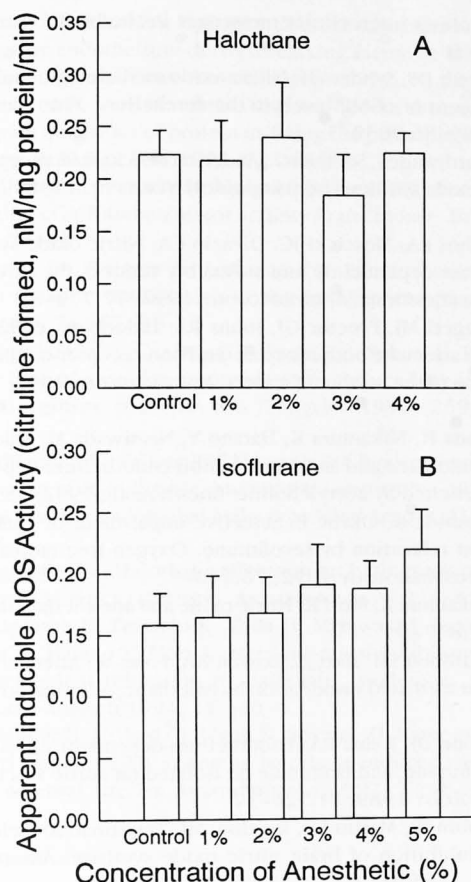

Fig. 6. Effect of halothane (A) and isoflurane (B) on the activity of partially purified inducible nitric oxide synthase of activated mouse macrophages. Each data point represents mean  $\pm$  SEM with  $n = 9$ .

tional anesthetics on the nitric oxide-guanylyl cyclase signaling pathway are proximal to guanylyl cyclase.

Endothelial nitric oxide synthase is a constitutive form of nitric oxide synthase, which requires calcium for activation<sup>5</sup> (fig. 1). Methacholine acts on the muscarinic receptor on the endothelial cell surface, resulting in a receptor-mediated increase in cytosolic calcium from both extracellular and intracellular sources and a subsequent increase in production of nitric oxide.<sup>14</sup> Methacholine may also cause the release of endothelium-derived hyperpolarizing factor to induce vasorelaxation, mainly in small blood vessels.<sup>37</sup> The contribution of hyperpolarizing factor to the vasorelaxation caused by methacholine in our current

experiments is minimal because 300  $\mu$ M L-NAME abolished the vasorelaxation by methacholine. Our results demonstrate that both halothane and isoflurane reversibly inhibited the vascular ring relaxation caused by methacholine. This inhibition occurred in the presence of indomethacin, which inhibits the production of vasoactive prostanoid metabolites; the production of which may be stimulated by methacholine as well as by inhalational anesthetics,<sup>19</sup> confirming the previous vascular ring studies in the absence of indomethacin.<sup>14,15,18,19</sup> The results also showed that neither halothane nor isoflurane affected the basal endothelial nitric oxide synthase activity because neither of them affected the basal tension in those endothelium-intact rings. Therefore, agonist-stimulated receptor activation and/or subsequent events leading to an increase in cytosolic calcium and nitric oxide synthase activation may be important sites for the inhalational anesthetic inhibition of the nitric oxide-guanylyl cyclase signaling pathway (fig. 1).

Inhalational anesthetics have been demonstrated to have significant effects on cytosolic calcium concentration in multiple cell types, including endothelial cells, through an effect on calcium movement into the cells, either by changing calcium influx through receptor- or voltage-activating membrane calcium channels or by an alteration in calcium release from or uptake into the sarcoplasmic reticulum.<sup>38,39</sup> Using fluorescent dye, Uhl *et al.*<sup>§</sup> and Loeb *et al.*<sup>40</sup> reported that halothane significantly inhibited the endothelial cell calcium transient stimulated by the agonists bradykinin and adenosine triphosphate. Inhalational anesthetics also have been shown to impair receptor activation. Halothane has been shown to shorten acetylcholine receptor kinetics,<sup>41</sup> and isoflurane has been shown to cause flickering of the acetylcholine receptor.<sup>42</sup> Many inhalational anesthetics (such as halothane, enflurane, and isoflurane) have been shown to interfere with the coupling between muscarinic receptors and their G proteins.<sup>43-45</sup> Therefore, it is clear from the literature that inhalational anesthetics can impair receptor activation and the cytosolic calcium responses caused by agonists. Consistent with this idea, a study from our laboratory demonstrated that inhalational anesthetics inhibited the receptor-mediated and nonreceptor-mediated but calcium-dependent nitric oxide synthase activation in rat aortic rings.<sup>14</sup>

Apart from the inhibition of endothelium-dependent relaxation, both halothane and isoflurane are also shown to have vasorelaxant effects in this isolated vessel

§ Uhl C, Sill JC, Nelson R, Johnson ME, Blaise G: Isoflurane and halothane and responses of cultured pig coronary artery endothelial cells (abstract). *ANESTHESIOLOGY* 1990; 73:A621.



preparation because the phenylephrine EC60 tension in the presence of 3% halothane or 3% isoflurane was significantly less than in controls. Consistent with previous reports, this vasorelaxation was endothelium-independent.<sup>28</sup>

In summary, both halothane and isoflurane produced a reversible inhibition of agonist-stimulated, nitric oxide-mediated vasorelaxation of rat aortic rings. Neither halothane nor isoflurane, at the tested concentrations, affected the basal endothelial nitric oxide synthase or inducible nitric oxide synthase vasorelaxation, isolated inducible nitric oxide synthase activity, or the increase of cGMP caused by inducible nitric oxide synthase in the LPS-treated rings. Therefore, the receptor activation and/or downstream signaling events that lead to increases in intracellular calcium and nitric oxide synthase activation or interactions with other cofactors or regulatory mechanisms of nitric oxide synthase activity may be primary sites for inhalational anesthetics to inhibit the nitric oxide-guanylyl cyclase signaling pathway.

## References

1. Furchgott RF, Zawadzki JV: The obligatory role of endothelial cells in the relaxation of arterial smooth muscle by acetylcholine. *Nature* 1980; 288:373-6
2. Moncada S, Palmer RMJ, Higgs EA: Nitric oxide: Physiology, pathophysiology, and pharmacology. *Pharmacol Rev* 1991; 43:109-42
3. Rapoport M, Murad F: Agonist-induced endothelium-dependent relaxation in rat thoracic aorta may be mediated through cGMP. *Circ Res* 1983; 52:352-7
4. Knowles RG, Palacios M, Palmer RMJ, Moncada S: Formation of nitric oxide from L-arginine in the central nervous system: A transduction mechanism for stimulation of the soluble guanylate cyclase. *Proc Natl Acad Sci U S A* 1989; 86:5159-62
5. Knowles RG, Moncada S: Nitric oxide synthases in mammals. *Biochem J* 1994; 298:249-58
6. Fleming I, Gray GA, Julou-Schaeffer G, Parratt JR, Stoclet J: Incubation with endotoxin activates the L-arginine pathway in vascular tissue. *Biochem Biophys Res Commun* 1990; 171:562-8
7. Griscavage JM, Rogers NE, Sherman MP, Ignarro LJ: Inducible nitric oxide synthase from a rat alveolar macrophage cell line is inhibited by nitric oxide. *J Immunol* 1993; 151:6329-37
8. White KA, Marletta MA: Nitric oxide synthase is a cytochrome P450 type hemoprotein. *Biochemistry* 1992; 31:6627-31
9. Gross SS, Jaffe EA, Levi R, Kolbouren RG: Cytokine-activated endothelial cells express an isotype of nitric oxide synthase which is tetrahydrobiopterin-dependent, calmodulin-independent and inhibited by arginine analogs with a rank-order of potency characteristic of activated macrophages. *Biochem Biophys Res Commun* 1991; 173:823-9
10. Garthwaite J, Charles SL, Chess-William R: Endothelium-derived relaxing factor release on the activation of NMDA receptors suggest role as intercellular messenger in the brain. *Nature* 1988; 336:385-8
11. Bredt DS, Synder SH: Nitric oxide mediated glutamate-linked enhancement of cGMP levels in the cerebellum. *Proc Natl Acad Sci U S A* 1989; 86:9030-3
12. Garthwaite J, Southam E, Anderton M: A kainate receptor linked to nitric oxide synthesis from arginine. *J Neurochem* 1989; 53:1952-4
13. Johns RA, Moscicki JC, DiFazio CA: Nitric oxide synthase inhibitor dose-dependently and reversibly reduces the threshold for halothane anesthesia. *ANESTHESIOLOGY* 1992; 77:779-84
14. Uggeri MJ, Proctor GJ, Johns RA: Halothane, enflurane, and isoflurane attenuate both receptor- and non-receptor-mediated EDRF production in the rat thoracic aorta. *ANESTHESIOLOGY* 1992; 76:1012-7
15. Toda H, Nakamura K, Hatano Y, Nishiwada M, Kakuyama M, Mori K: Halothane and isoflurane inhibit endothelium-dependent relaxation elicited by acetylcholine. *Anesth Analg* 1992; 75:198-203
16. Yoshida K, Okabe E: Selective impairment of endothelium-dependent relaxation by sevoflurane: Oxygen free radicals participation. *ANESTHESIOLOGY* 1992; 76:440-7
17. Nakamura K, Mori K: Nitric oxide and anesthesia. *Anesth Analg* 1993; 77:877-9
18. Muldoon SM, Hart JL, Bowen KA, Freas W: Attenuation of endothelium-mediated vasodilation by halothane. *ANESTHESIOLOGY* 1988; 68:31-7
19. Stone DJ, Johns RA: Endothelium-dependent effects of halothane, enflurane, and isoflurane on isolated rat aortic vascular rings. *ANESTHESIOLOGY* 1989; 71:126-32
20. Tobin JR, Martin LD, Breslow MJ, Traystman RJ: Selective anesthetic inhibition of brain nitric oxide synthase. *ANESTHESIOLOGY* 1994; 81:1264-9
21. Blaise G, To Q, Parent M, Lagarde B, Asenjo F, Sauve R: Does halothane interfere with the release, action, or stability of endothelium-derived relaxing factor/nitric oxide? *ANESTHESIOLOGY* 1994; 80:417-26
22. Hart JL, Jing M, Bina S, Freas W, Van Dyke RA, Muldoon SM: Effects of halothane on EDRF/cGMP-mediated vascular smooth muscle relaxations. *ANESTHESIOLOGY* 1993; 79:323-31
23. Jing M, Hart JL, Masaki E, Van Dyke RA, Bina S, Muldoon SM: Vascular effects of halothane and isoflurane: cGMP dependent and independent actions. *Life Sci* 1995; 56:19-29
24. Zuo Z, Johns RA: Halothane, enflurane and isoflurane do not affect the basal or agonist-stimulated activity of partially isolated soluble and particulate guanylyl cyclase of rat brain. *ANESTHESIOLOGY* 1995; 83:395-404
25. Rengasamy A, Ravichandran LV, Reikersdorfer CG, Johns RA: Inhalational anesthetics do not alter nitric oxide synthase activity. *J Pharmacol Exp Ther* 1995; 273:599-604
26. Johns RA, Tichotsky A, Muro M, Spaeth JP, Le Cras TD, Rengasamy A: Halothane and isoflurane inhibit endothelium-derived relaxing factor-dependent cyclic guanosine monophosphate accumulation in endothelial cell-vascular smooth muscle co-cultures independent of an effect on guanylyl cyclase activation. *ANESTHESIOLOGY* 1995; 83:824-834
27. Zelenkov P, McLoughlin T, Johns RA: Endotoxin enhances hypoxic constriction of rat aorta and pulmonary artery through induction of EDRF/NO synthase. *Am J Physiol* 1993; 265:L346-L54
28. Brendel JK, Johns RA: Halothane and isoflurane inhibit endothelium-dependent relaxation of rat aortic rings by endothelium-derived relaxing factor. *ANESTHESIOLOGY* 1990; 72:1004-10
29. Bradford M: A rapid and sensitive method for the quantitation of microgram quantities of protein utilizing a single dye binding. *Anal Biochem* 1976; 72:248-55
30. Vulliamoz Y, Verstraete A, Julou-Schaeffer G, Stoclet J: Effect of halothane on cerebellar cGMP and nitric oxide synthase activity. *ANESTHESIOLOGY* 1993; 79:84-9
31. Pearce RA, Strimling P, Johns RA: The effects of inhalational anesthetics on synaptic transmission. *ANESTHESIOLOGY* 1989; 71:591-600
32. Julou-Schaeffer G, Stoclet J: Loss of vascular endothelium-dependent relaxation involves L-arginine pathway. *ANESTHESIOLOGY* 1993; 79:84-9
33. Radomski MW, Jones AD, Jones RA: The expression of an inducible nitric oxide synthase in vascular endothelium. *ANESTHESIOLOGY* 1994; 81:1004-10
34. Tagliente TM, Jones AD, Jones RA: The kinetics of nitric oxide synthase enzyme activity in vascular endothelium. *ANESTHESIOLOGY* 1994; 81:1004-10
35. Nakamura K, Tichotsky A, Nishiwada M, Hatano Y, Mori K: Endothelium-dependent relaxation of rat aortic rings by halothane, enflurane, and isoflurane. *Can J Anaesth* 1993; 40:1004-10
36. Eskinder H, Higgs EA: The effect of halothane on the activity of guanylyl cyclase-coupled receptors in canine cerebral artery. *ANESTHESIOLOGY* 1994; 81:1004-10

## ANESTHETICS AND NITRIC OXIDE-GUANYLYL CYCLASE PATHWAY

28. Brendel JK, Johns RA: Isoflurane does not vasodilate rat thoracic aortic rings by endothelium-derived relaxing factor or other cyclic GMP-mediated mechanisms. *ANESTHESIOLOGY* 1992; 77:126-31
29. Bradford M: A rapid and sensitive method for the quantitation of microgram quantities of protein utilizing the principle of protein-dye binding. *Anal Biochem* 1976; 72:248-54
30. Vulliemmoz Y, Verosky M, Alpert M, Triner L: Effect of enflurane on cerebellar cGMP and on motor activity in the mouse. *Br J Anaesth* 1983; 55:79-84
31. Pearce RA, Stringer JL, Lothman EW: Effect of volatile anesthetics on synaptic transmission in the rat hippocampus. *ANESTHESIOLOGY* 1989; 71:591-98
32. Julou-Schaeffer G, Gray GA, Fleming I, Schott C, Parratt JR, Stoclet J: Loss of vascular responsiveness induced by endotoxin involves L-arginine pathway. *Am J Physiol* 1990; 259:H1038-H43
33. Radomski MW, Palmer RMJ, Moncada S: Glucocorticoids inhibit the expression of an inducible, but not the constitutive, nitric oxide synthase in vascular endothelial cells. *Proc Natl Acad Sci U S A* 1990; 87:10043-7
34. Tagliente TM: Halothane effects on rat brain nitric oxide synthase enzyme kinetics (abstract). *ANESTHESIOLOGY* 1994; 81:A806
35. Nakamura K, Terasalo K, Toda H, Miyawaki I, Kakuyama M, Nishiwada M, Hatano Y, Mori K: Mechanisms of inhibition of endothelium-dependent relaxation by halothane, isoflurane, and sevoflurane. *Can J Anaesth* 1994; 41:340-6
36. Eskinder H, Hillard CJ, Flynn N, Bosnjak ZJ, Kampine JP: Role of guanylyl cyclase-cGMP system in halothane-induced vasodilation in canine cerebral arteries. *ANESTHESIOLOGY* 1992; 77:482-7
37. Nagao T, Vanhoutte PM: Endothelium-derived hyperpolarizing factor and endothelium-dependent relaxations. *Am J Respir Cell Mol Biol* 1993; 8:1-6
38. Su JY, Zhang CC: Intracellular mechanisms of halothane's effect on isolated aortic strips of the rabbit. *ANESTHESIOLOGY* 1989; 71:409-17
39. Klip A, Britt BA, Elliott ME, Walker D, Ramlal T, Pegg W: Changes in cytoplasmic free calcium caused by halothane. Role of the plasma membrane and intracellular  $Ca^{++}$  stores. *Biochem Cell Biol* 1986; 64:1181-9
40. Loeb AL, Longnecker DE, Williamson JR: Alteration of calcium mobilization in endothelial cells by volatile anesthetics. *Biochem Pharmacol* 1993; 45:1137-42
41. Lechleiter J, Gruener R: Halothane shortens acetylcholine receptor channel kinetics without affecting conductance. *Proc Natl Acad Sci U S A* 1984; 81:2929-33
42. Brett RS, Dilger JP, Yland KF: Isoflurane causes flickering of the acetylcholine receptor channel: Observations using patch clamp. *ANESTHESIOLOGY* 1988; 69:157-60
43. Anthony BL, Dennison RL, Aronstam RS: Disruption of muscarinic receptor-G protein coupling is a general property of liquid volatile anesthetics. *Neurosci Lett* 1989; 99:191-6
44. Durieux M: Halothane inhibits signaling through m1 muscarinic receptors expressed in *Xenopus* oocytes. *ANESTHESIOLOGY* 1995; 82:174-82
45. Minami K, Yanagihara N, Toyohira Y, Tsutsui M, Shigematsu A, Wada A, Izumi F: Isoflurane inhibits nicotinic acetylcholine receptor-mediated  $^{22}Na^{+}$  influx and muscarinic receptor-evoked cyclic GMP production in cultured bovine adrenal medullary cells. *Naunyn-Schmiedeberg Arch Pharmacol* 1994; 349:223-9
